1 **Visual outcome and associated risk factors in patients following small incision**  
2 **cataract surgery at the National Referral Hospital, Bhutan.**

3 Sandip Tamang<sup>1,3</sup>, Nor Tshering Lepcha<sup>2</sup>, Mendu Dukpa<sup>2</sup>, Karma Tenzin<sup>1</sup>

4

5 <sup>1</sup> Khesar Gyalpo University of Medical Sciences of Bhutan

6 <sup>2</sup> Jigme Dorji Wangchuck National Referral Hospital, Bhutan

7 <sup>3</sup> Eastern Regional Referral Hospital, Bhutan

8

9 **Abstract**

10 Purpose: To evaluate small incision cataract surgery visual outcomes and associated risk factors  
11 in a tertiary eye care center in Bhutan.

12 Methods: This was a hospital-based prospective longitudinal study. A total of 310 patients who  
13 met the eligibility criteria were included in the study. Results: The mean age of the patients was  
14 68.36 (SD: 12.74 years), and 157 (50.6%) were male. 285 (91.94%) of the cataract-operated eyes  
15 had best-corrected vision greater than 6/60, while

16 25 (8.06%) of the eyes had vision less than 6/60. 47 individuals (15.16%) had pre-existing  
17 ocular co-morbidity. Intraoperative complications were seen in 19 eyes (6%). At the 6-week  
18 follow-up visit, based on best-corrected visual acuity (BCVA), 90.65% had a good visual

19 outcome. Analysis of multiple logistic regression showed that patients with preoperative ocular  
20 comorbidities (OR 50.92; 95% CI 10.23, 253.37) and those with operative complications (OR  
21 16.59; 95% CI 3.54, 77.70) were significantly associated with poor visual outcome.

22 Conclusions: This study shows that cataract surgery can restore good visual acuity. However,  
23 patients should be followed up on for a longer period, and greater emphasis should be given to  
24 monitoring outcomes after cataract surgery.

## 25 **Introduction**

26 The World Health Organization (WHO) reports that globally, at least 1 billion people have  
27 preventable near or distance vision impairment. Cataract is the leading cause of vision  
28 impairment and blindness in 65.2 million people globally (1). In Southeast Asia, the proportion  
29 of blindness due to cataracts was 44% (2).

30 Bhutan, located in the Eastern Himalayas between India and China, has a population of 7, 35,553  
31 (3). The prevalence of visual impairment in Bhutan was 1%, with cataracts contributing as the  
32 major cause (48.3%) of preventable blindness.

33 A cataract is a clouding of the natural intraocular lens and, if not corrected can lead to diminution  
34 of vision and irreversible blindness. Small incision cataract surgery (SICS) involves the removal  
35 of a cloudy lens and the implantation of an intraocular lens (IOL) (4). It is the most effective  
36 method to restore vision.

37 However, the outcome of the cataract surgery determines the vision-related functioning and  
38 improvement in the patient's life, which is measured in terms of visual acuity. WHO  
39 recommends more than 80% of eyes with available correction between discharge and 12 weeks  
40 postoperatively should have good visual acuity of 6/6-6/18, and less than 5% of eyes should have  
41 poor visual acuity of <6/60 (5).

42 However, the Rapid Assessment of Avoidable Blindness (RAAB) survey conducted in 2018  
43 noted a postoperative good visual outcome of 67.3% for the country, which was found to be  
44 below the WHO recommendation (6).

45 Studies have shown that increasing patient age is associated with poor visual outcomes following  
46 SICS. Studies conducted in Bangladesh showed that the risk for poor visual outcomes was  
47 increased by 4.63-fold among patients aged 70 years and above (7). Studies in Liberia and India  
48 also reported similar findings with older age (8–10). One of the large studies conducted in 4 sites  
49 in North America and Europe, which included the United States, Spain, Canada, and Denmark,  
50 also demonstrated that older age was associated with poor visual outcomes (11).

51 The second RAAB survey conducted in the country in 2018 found that following SICS, the main  
52 cause of poor visual outcome was ocular comorbidities in 43.6%. These included corneal  
53 opacities, glaucoma, and posterior segment diseases such as diabetic retinopathy and age-related  
54 macular degeneration (6). The presence of pre-existing ocular pathology is a strong independent  
55 predictor of visual outcomes after SICS, as found in a study in India (12). Other studies in India  
56 have also shown that poor visual outcomes were due to pre-existing ocular comorbidities  
57 impacting the visual functioning of the patients (13, 14). Visual outcomes of SICS in Denmark,  
58 the United States, Spain, and Canada showed poorer outcomes with coexisting ocular  
59 comorbidities (11). Similar findings have also been noted in studies conducted in Australia and  
60 Nigeria where ocular comorbidities affected the final visual outcome of the patients (15–17). A  
61 study in Nepal by Hening et al. also demonstrated poor visual outcomes in those patients who  
62 had ocular comorbidities (18).

63 The RAAB survey conducted for the country in 2018 noted that surgical complications  
64 amounted to 40.5 %, while postoperative sequelae amounted to 22.2%, which impacted the final

65 visual outcomes of the patients resulting in the good visual outcomes being below WHO  
66 recommendation for the country (6).

67 Cox JT et al. noted the mean SICS complication rate for all surgeons to be  $1.7\pm 1.0\%$  for both  
68 intraoperative and postoperative complications (9).

69 A study in Nepal demonstrated that postoperative complications, mainly the postoperative  
70 sequelae such as PCO, cause poor visual outcomes in the patients (19). Another study in Nepal  
71 also showed that surgical complications such as posterior capsular rent vitreous loss and  
72 endophthalmitis that occurred caused poor visual outcomes (20). Ruit S et al. also inferred a  
73 relation between poor visual outcomes and surgical compilations (21).

74 Studies conducted in African countries had good postoperative visual acuity below the WHO  
75 recommended criteria, indicating a similar pattern for developing countries (22, 23). Norregaard  
76 JC et al. demonstrated a superior visual outcome following SICS above the WHO  
77 recommendation, which was conducted in the United States, Canada, Denmark, and Spain (11).

78 A similar outcome has also been noted in studies in India (10). However, there are studies in  
79 Bangladesh and Nigeria that reported poor outcomes following cataract surgeries (7, 16).

80 In Bhutan, Jigme Dorji Wangchuck National Referral Hospital (JDWNRH) functions as the only  
81 tertiary-level eye care center in the country, and there is a need to routinely monitor the outcome  
82 of cataract surgery and to follow standardized cataract surgical protocols and postoperative  
83 follow-up care.

84 The study aimed to evaluate postoperative visual acuity and study factors associated with poor  
85 visual outcomes and form the baseline data for the Department of Ophthalmology, JDWNRH.

86

## 87 **Material and Methods**

88 This is a hospital-based study conducted at the Gyalyum Kesang Choden Wangchuck National  
89 Eye Center (GKCWNEC), Jigme Dorji Wangchuck National Referral Hospital (JDWNRH),  
90 Bhutan. The study design was a prospective longitudinal study. Patients who had visited the  
91 GKCWNEC and had undergone small incision cataract surgery (SICS) from 1st September 2021  
92 to 30th April 2022 were eligible to be included in this study. The sampling method was census  
93 sampling. Patients who were 18 years and above were included. Consequently, congenital  
94 cataracts, patients with secondary intraocular (IOL) implantation, and those undergoing  
95 combined procedures with SICS (e.g., SICS with corneal graft or SICS with trabeculectomy,  
96 etc.) were excluded. Due to poor visual prognosis after surgery, these patients were excluded.

97

98 All socio-demographic data were collected from the patients, and the pre-operative and post-  
99 operative data were collected from the patient's medical record after following up with the  
100 patient, which was recorded in the standard cataract surgical record (CSR) form. The standard  
101 pre-operative examination included a detailed history, measurements of presenting visual acuity  
102 (PVA), and best corrected visual acuity (BCVA) with Snellen charts. Computerized Snellen  
103 charts were used to test PVA and BCVA. The visual acuity of each eye was classified according  
104 to the WHO-recommended guideline for cataract outcome grading. PVA and BCVA were  
105 measured by optometrists in refraction rooms where computerized Snellen charts were used,  
106 which measured the presenting visual acuity without correction and best corrected visual acuity  
107 with pinhole. All these records were directly obtained from the patient's documents which were  
108 recorded before SICS and then at day 1, day 7, and 6 weeks post-SICS. Intraocular pressure

109 measurement was done with an Icare (rebound tonometer) as well as applanation tonometry  
110 where needed.

111

112 Patients were assessed by ophthalmologists in different consultation chambers before SICS and  
113 then followed up and assessed on day 1, day 7, and 6 weeks post-SICS. The patients had detailed  
114 slit lamp assessment including anterior segment examination of cornea, anterior chamber, and  
115 pupils and dilated examination to assess the lens status which was classified according to Lens  
116 Opacity Classification System III. Posterior segment pathology was assessed with a +90D lens.  
117 Any ocular pathology (anterior or posterior segment) was noted if present. Ocular comorbidities  
118 were grouped as corneal scars, old iritis, retinal diseases, glaucoma, and others. All the findings  
119 were noted in the patient's documents and were obtained when the patient presented to the pre-  
120 operative chamber. Before the surgery, biometry and sac syringing was done for all the patients  
121 and they also underwent blood investigations (viral markers, TPHA (Treponema Pallidum  
122 Hemagglutination Assay), RPR (Rapid Plasma Reagin) and random blood sugar). Any findings  
123 that were either not clear or missing were directly consulted with the assessing ophthalmologist  
124 and recorded in the CSR. Standard Operating Procedures (SOP) and definitions specified in the  
125 World Health Organization (WHO) Manual for Monitoring Cataract Surgical Outcomes (MCSO)  
126 were followed. For assessment of visual outcome, visual acuities were categorized according to  
127 WHO guidelines: good (6/6-6/18), borderline (6/24-6/60), or poor surgical outcomes (<6/60).

128

129 The study questionnaire was coded and a data documentation sheet was prepared. Data were  
130 double-entered between September 2021 and June 2022, validated, and analyzed using EpiData  
131 (version 3.1 for entry and version 2.2.2.183 for analysis, EpiData Association, Odense,

132 Denmark). Additional analysis was performed using STATA (version 13.0, licensed by  
133 KGUMSB, Bhutan). Factors associated with visual acuity (age, ocular morbidity, systemic  
134 comorbidity, postoperative complications) were tested using unadjusted analysis using logistic  
135 regression. Those factors with  $p < 0.1$  were included in the final model for adjusted analysis. For  
136 all statistical analysis,  $p$ -value  $< 0.05$  was considered significant.

137 The Ethics Committee of the Khesar Gyalpo University of Medical Sciences of Bhutan  
138 (KGUMSB), Bhutan, approved this study and it was conducted according to the tenets of the  
139 Declaration of Helsinki.

140

## 141 **Results**

### 142 **Demographic characteristics**

143 From 1st September 2021 to 30th April 2022, 430 patients underwent SICS, out of which 372  
144 were included in the study and fulfilled the inclusion criteria. Among that 310 patients completed  
145 the follow-up with a response rate of 83%, while 62 were lost to follow-up. These 62 patients  
146 who were lost to follow-up were all living outside Thimphu and did not have their follow-up at  
147 the Department of Ophthalmology, JDWNRH. The remaining 310 patients were then analyzed.  
148 Amongst the 310 patients analyzed in the study, there were 157 male and 153 female patients.  
149 The mean age among the group was 68.36 (SD 12.74).

150 As illustrated in Figure 1, the highest percentage [70.65%,  $n = 219$ ] of the patients belonged to  
151 the age group above 65 years followed by the age group of 55 – 65 years [16.77%,  $n= 52$ ].

152 Amongst the patients analyzed in the study, 74.52% ( $n=231$ ) had no schooling. Unemployed  
153 patients accounted for 94.19% ( $n=292$ ) while patients living outside Thimphu accounted for

154 87.42% (n=271). Table 1 provides a breakdown of the qualification, employment status, and  
155 present address.

156

157 **Table 1: Employment status, qualification, and present address of the patients who**  
158 **underwent SICS at Jigme Dorji Wangchuck National Referral Hospital, Thimphu,**  
159 **Bhutan from 1<sup>st</sup> September 2021 to 30<sup>th</sup> April 2022 (n=310)**

160

| Patient profile           | N   | (%)     |
|---------------------------|-----|---------|
| Total                     |     | (100)   |
| Qualification             |     |         |
| No schooling              | 231 | (74.52) |
| Primary/Secondary         | 59  | (19.03) |
| High school               | 9   | (2.90)  |
| Degree                    | 11  | (3.55)  |
| Current employment status |     |         |
| Employed                  | 18  | (5.81)  |
| Unemployed                | 292 | (94.19) |
| Present address           |     |         |
| Lives in Thimphu          | 39  | (12.58) |
| Lives outside Thimphu     | 271 | (87.42) |

161

162 According to the occupation of the patients, the maximum were farmers (n=173) followed  
163 by housewives (n=107) and the rest were in other categories as depicted in Figure 2.

164 Socio-demographic profiles such as age, gender, working status, and occupation associated  
165 with poor visual outcomes were analyzed and it was found to have no significant association



166 (p-value >0.05) as depicted in Table 2.

167

168 **Table 2: Socio-demographic factors associated with poor visual outcome after SICS at**

169 **Jigme Dorji Wangchuck National Referral Hospital from 1<sup>st</sup> September 2021 to 30<sup>th</sup> April**

170 **2022.**

| Socio-demographic characteristics    | N   | (%)     | Unadjusted OR | aOR       | 95% CI      | p-value |
|--------------------------------------|-----|---------|---------------|-----------|-------------|---------|
| <b>Age group</b>                     |     |         |               |           |             |         |
| 18– 34                               | 9   | (2.90)  | Reference     | Reference |             |         |
| 35 – 44                              | 6   | (1.94)  | 2.50          | 2.95      | 0.20-42.83  | 0.427   |
| 45 – 54                              | 24  | (7.74)  | 11.50         | 11.31     | 0.92-138.54 | 0.058   |
| 55 – 65                              | 52  | (16.77) | 12.50         | 6.73      | 0.75-60.03  | 0.088   |
| Above 65                             | 219 | (70.65) | 5.58          | 2.73      | 0.43-17.03  | 0.281   |
| <b>Gender</b>                        |     |         |               |           |             |         |
| Male                                 | 157 | (50.65) | 1.33          |           |             |         |
| Female                               | 153 | (49.35) | Reference     |           |             |         |
| <b>Working status</b>                |     |         |               |           |             |         |
| Employed                             | 18  | (5.81)  | 0.27          | 4.13      | 0.03-1.40   | 0.113   |
| Not employed                         | 292 | (94.19) | Reference     | Reference |             |         |
| <b>Occupation</b>                    |     |         |               |           |             |         |
| Civil Servant/<br>Private/ Corporate | 14  | (4.52)  | 0.24          |           |             |         |
| Housewife                            | 107 | (34.52) | 0.82          |           |             |         |
| Farmer                               | 173 | (55.81) | 0.82          |           |             |         |
| Others                               | 16  | (5.16)  | Reference     |           |             |         |

171

172 Among the patients who underwent cataract surgery, nearly 53% (n = 163) had their right eye

173 operated, whereas around 47% (n = 147) had their left eye operated.

174 Among the patients who underwent cataract surgery, almost 72% (n = 224) had no comorbidities,

175 whereas around 28% had one or more comorbidities (hypertension, diabetes, rheumatoid arthritis,  
176 bronchial asthma, syphilis, and chronic obstructive pulmonary disease), as shown in Figure 3.

177

### 178 Visual Acuity Outcome

179 The visual outcome has been categorized into presenting visual acuity (PVA) and best  
180 corrected visual acuity (BCVA) and measured at postoperative day 1, day 7, and 6 weeks.

181 Figure 4 depicts the total number of patients with BCVA at different post-operative visits.

182 Table 3 shows the BCVA before SICS and 6 weeks post-SICS in line with the WHO

183 monitoring of cataract surgical outcomes.

184

185 **Table 3: Best Corrected Visual acuity outcome in the operated eye of the patients before**  
186 **SICS and 6 weeks post-SICS at Jigme Dorji Wangchuck National Referral Hospital,**  
187 **Thimphu, Bhutan from 1<sup>st</sup> September 2021 to 30<sup>th</sup> April 2022 (n=310) according to WHO**  
188 **recommendation**

189

| Category of Outcome | Level of VA | Best corrected VA before SICS |         | Best corrected VA at 6 weeks post- SICS |         |
|---------------------|-------------|-------------------------------|---------|-----------------------------------------|---------|
|                     |             | N                             | %       | N                                       | %       |
| Good                | 6/6-6/18    | 30                            | (9.68)  | 281                                     | (90.65) |
| Borderline          | <6/18-6/60  | 125                           | (40.32) | 4                                       | (1.29)  |
| Poor                | <6/60       | 155                           | (50.00) | 25                                      | (8.06)  |

190

191

192  
193  
194  
195  
196  
197  
198  
199  
200  
201  
202  
203  
204  
205  
206  
207  
208  
209  
210  
211

Ocular pathology, Operative complication, and systemic comorbidities

Ocular pathology was seen in 15.16% (n = 47) of the patients, while 84.84% (n = 263) did not have any ocular pathology. These included corneal scars, retinal disease, glaucoma, and others. From the ocular pathology, a majority had retinal disease (n = 21), followed by others (n = 15), corneal scar (n = 6), and glaucoma (n = 5). Retinal diseases included age-related macular degeneration (ARMD), macular scars, macular holes, and retinal detachment surgery. Other ocular pathologies included complicated uveitic cataracts, retinitis pigmentosa, pseudoexfoliation, traumatic cataracts, Fuchs heterochromic iridocyclitis, optic atrophy, and vitreous hemorrhage. Poor visual outcome was significantly associated with retinal disease (aOR 50.92; 95% CI: 10.23, 253.37), glaucoma (aOR 13.75; 95% CI: 1.26, 150.06), corneal scar (aOR 23.55; 95% CI: 3.01, 184.02), and others (aOR 12.14; 95% CI: 2.36, 62.33), as shown in Table 4.

212 **Table 4: Clinical factors associated with poor visual outcome after SICS at Jigme Dorji**  
 213 **Wangchuck National Referral Hospital, Thimphu, Bhutan from 1<sup>st</sup> September 2021 to 30<sup>th</sup>**  
 214 **April 2022.**

| Clinical characteristics       | N   | (% )    | Crude OR  | aOR       | P Value | 95% CI |        |
|--------------------------------|-----|---------|-----------|-----------|---------|--------|--------|
|                                |     |         |           |           |         | Lower  | Upper  |
| Ocular pathology               |     |         |           |           |         |        |        |
| Corneal scar                   | 6   | (1.94)  | 25.3      | 23.55     | 0.003   | 3.01   | 184.02 |
| Retinal disease                | 21  | (6.77)  | 23        | 50.92     | <0.001  | 10.23  | 253.37 |
| Glaucoma                       | 5   | (1.61)  | 6.32      | 13.75     | 0.032   | 1.26   | 150.06 |
| Others                         | 15  | (4.84)  | 12.65     | 12.14     | 0.003   | 2.36   | 62.33  |
| None                           | 263 | (84.84) | Reference | Reference |         |        |        |
| Operative complications        |     |         |           |           |         |        |        |
| None                           | 291 | (93.87) | Reference | Reference |         |        |        |
| Striate keratopathy            | 13  | (4.19)  | 9.47      | 16.59     | <0.001  | 3.54   | 77.70  |
| *Others                        | 6   | (21.94) | -         |           |         |        |        |
|                                |     |         |           |           |         |        |        |
| Systemic comorbidities         |     |         |           |           |         |        |        |
| None                           | 224 | (72.26) | Reference | Reference |         |        |        |
| Diabetes                       | 13  | (4.19)  | 8.12      | 0.78      | 0.794   | 0.122  | 4.96   |
| Hypertension                   | 55  | (17.74) | 1.30      | 1.16      | 0.822   | 0.30   | 4.46   |
| Both Diabetes and Hypertension | 13  | (4.19)  | 2.36      | 0.81      | 0.847   | 0.09   | 6.76   |
| Others                         | 5   | (1.61)  | 3.25      | -         |         |        |        |

215 Almost 94% (n = 291) had no operative complications, while 6% (n = 19) had operative  
216 complications, which included striate keratopathy (n = 13) and others (n = 6) (capsule rupture  
217 without vitreous loss, capsule rupture with vitreous loss, and wound leak). Complications like  
218 zonular dehiscence, retained lens matter, and endophthalmitis did not occur. Striate keratopathy  
219 was mostly seen in patients (n = 13) who already had ocular pathology, and it persisted over time  
220 and impacted the visual acuity. It was found to have a significant association with poor visual  
221 outcomes (aOR 16.59; 95% CI: 3.54, 77.70).

222 Systemic comorbidities comprised diabetes, hypertension, and others (such as bronchial asthma,  
223 syphilis, chronic obstructive pulmonary disease (COPD), and rheumatoid arthritis). Around  
224 72.26% (n = 224) had no comorbidities, while 27.74% (n = 86) had either one or more systemic  
225 illnesses, which did not have any significant association with poor visual outcomes.

226 As very few patients who underwent SICS had vision < 6/60 (n = 25), the causes were mostly  
227 selection, amounting to 64% (n = 16), followed by surgery with almost 28% (n = 7) and 8%  
228 (n=2) for sequelae (which included posterior capsular opacification (PCO)).

229

230

231

232

233

234

235

236

237

238 **Discussion**

239 Demographic characteristics

240 Age

241 The age distribution was found to be such that the majority were above the age of 65 years, with  
242 a mean age of  $68.36 \pm 12.74$  years. The high percentage of patients belonging to the age group  
243 above 65 years is consistent with the well-established fact that cataracts primarily affect older  
244 individuals (24). In this study, there was no association found between increasing age and the  
245 visual outcomes, which is quite contrary to some of the studies that demonstrated a correlation  
246 between the two (25, 26)

247

248 Gender

249 In this study, there was no predilection to any gender and it was found to be almost similar with  
250 50.65% male and 49.35% female patients.

251 This study did not find any significant association between gender and final visual outcomes,  
252 which is also consistent with several studies in similar contexts (27, 28). It differed from studies  
253 where there was a significant association between male gender and improved visual outcome.  
254 This association aligns with several studies (10, 13, 22, 26). Interestingly, some studies in India  
255 have shown that the female gender significantly improved postoperative visual acuity, which  
256 might be due to improved postoperative self-care among women (29, 30). The relationship  
257 between gender and visual acuity is complex and multifaceted considering various contradictory  
258 findings.

259

260

261 Employment status, qualification, and present address

262 This study found that most of the patients (74.52%) had no schooling and had undergone cataract  
263 surgery. It was comparable to a study in Bangladesh where most of the patients were illiterate  
264 and most of them lived in rural areas, similar to our study (7). The fact that a significant portion  
265 of patients lived outside Thimphu suggests that people from different regions have access to  
266 specialized eye care services in the capital city. It can also be noted that the patients who were  
267 lost to follow-up were living outside Thimphu and they were not able to return for a  
268 postoperative visit at the Department of Ophthalmology, JDWNRH. Since eye care services are  
269 provided throughout the country at referral hospitals as well as at the district hospitals, it could  
270 be inferred that those lost to follow-up patients were likely seen at one of the health centers.

271

272 Systemic comorbidities

273 In this study around 72% of the patients had no comorbidities while 28% had one or more  
274 comorbidities which consisted of Diabetes, Hypertension, Rheumatoid arthritis, Bronchial  
275 asthma, Syphilis, and COPD. The study revealed that the majority of patients had no systemic  
276 comorbidities, with diabetes and hypertension being the most prevalent among those who did.  
277 These findings are consistent with the high prevalence of diabetes and hypertension in many  
278 populations worldwide (31). The absence of a significant association between systemic  
279 comorbidities and visual outcomes aligns with some studies (32, 33).

280

281 Ocular comorbidities

282 The study found a significant association between ocular comorbidities and visual outcomes.  
283 Retinal disease amounted to about 44.6% (n=21) of the total ocular comorbidities. Retinal

284 diseases included age-related macular degeneration (ARMD), macular scar, macular hole, and  
285 retinal detachment surgery. The patients who had retinal diseases before the surgery had  
286 significantly poor visual outcomes. Poor visual outcome was significantly associated with retinal  
287 disease (aOR 50.92; 95% CI: 10.23, 253.37), glaucoma (aOR 13.75; 95% CI: 1.26, 150.06),  
288 corneal scar (aOR 23.55; 95% CI: 3.01, 184.02), and others (aOR 12.14; 95% CI: 2.36, 62.33).  
289 Other ocular pathologies included complicated uveitic cataracts, retinitis pigmentosa,  
290 pseudoexfoliation, traumatic cataracts, Fuchs heterochromic iridocyclitis, optic atrophy, and  
291 vitreous hemorrhage. The presence of ocular pathology in 15% of the patients is in line with  
292 several studies reporting varying rates of ocular comorbidities among cataract patients (34, 35).  
293 It was noted that the ocular pathology contributed to poor visual outcomes despite the surgeons  
294 performing good SICS. Studies have also noted similar findings where the final visual outcome  
295 was affected by the ocular pathology (10, 16, 23, 32). Ocular pathology was found to have a  
296 significant effect on the overall visual acuity where it was important to recognize the condition  
297 before surgery.

298 It was similarly noted in the RAAB survey where 43.6% were due to ocular co-morbidities that  
299 caused poor visual outcomes. It was also noted that posterior segment diseases such as glaucoma,  
300 diabetic retinopathy, and age-related macular degeneration contributed to 15.4% of all visual  
301 impairment and 26.1% of blindness (6).

302 This shows that to detect ocular comorbidities that are likely to affect results, a thorough  
303 preoperative eye examination by an ophthalmologist would be required. Then, patients who have  
304 ocular comorbidities can be counseled and given a thorough explanation of the outcome of the  
305 surgery.

306



307 Postoperative complications

308 The occurrence of operative complications in 6% of the patients, primarily striate keratopathy,  
309 was within the range reported in other studies investigating complications following cataract  
310 surgery (13, 36). The study found a significant association between striate keratopathy and visual  
311 outcome (aOR 16.59: 95% CI 3.54, 77.70). It was noted that striate keratopathy occurred in all  
312 the patients with corneal scar (n=6) demonstrating that the patients with ocular comorbidity such  
313 as corneal scar were already at the risk of developing operative complications. So, these patients  
314 had poor outcomes which was related to the preexisting ocular pathology. Similar associations  
315 were not noted in other studies.

316 Postoperative complications that were noted in this study were also demonstrated in several other  
317 studies that had affected the final visual outcome (14, 30, 37).

318 However, the absence of severe complications such as zonular dehiscence, retained lens matter,  
319 and endophthalmitis was reassuring and suggested a satisfactory safety profile of SICS in our  
320 study population. It would be due to experienced surgeons performing the cataract surgeries  
321 instead of the resident doctors. It could also be attributed to the experience of the surgeons  
322 managing intra-operative complications. Better operative facilities with proper surgical  
323 instruments and well-trained operating assistants were other factors that resulted in fewer  
324 complications.

325

326 Visual outcomes

327 According to the WHO and the International Agency for the Prevention of Blindness (IAPB)  
328 action plan, good postoperative visual acuity should be obtained in >80% with available  
329 correction and >90% with the best correction for a vision of 6/6 - 6/18 (5). The preoperative best

330 corrected good and poor visual outcome was 9.68% (n=30) and 50% (n=155) respectively. The  
331 study found that a good visual outcome after 6 weeks of SICS was 90.65% (n=281). It was found  
332 to be above the WHO recommendation for monitoring cataract outcomes. This was consistent  
333 with the expected positive outcomes of cataract surgery in improving vision (38). It was  
334 comparable to studies which had conducted in India and other countries (10, 13, 39-41). This  
335 was better than the studies conducted in some developing countries where the visual outcomes  
336 were below the WHO recommendation (42-45). The improvement was mainly due to well-  
337 trained surgeons and operating assistants, better biometry services, and well-trained staff  
338 conducting biometry before the surgery.

339 However, poor visual outcome was 8.06% (n=25) 6 weeks post-SICS which was more than the  
340 WHO recommendation (<5%). This might have resulted due to ocular morbidities as well as  
341 surgical complications that had affected the final visual outcome.

342 It was found that only around 72.7% had good visual outcomes with the best correction in the  
343 second RAAB survey, while poor visual outcome was reduced from 15% to 11.5%.

344 The improvement in the good visual outcome compared to 2018 in its RAAB survey, would be  
345 likely due to better healthcare infrastructure in the capital with the shifting of the department into  
346 a separate well-established National Eye Care Center with improved facilities and availability of  
347 specialized services including vitreoretinal services (60).

348

349 Causes of presenting vision <6/60

350 The causes of vision <6/60 at the postoperative 6 weeks were found to be majority due to  
351 selection (64%, n=16) followed by surgery (28%, n=7) and sequelae (8%, n=2). This indicated  
352 that the selection of cases was an important aspect before the surgery.

353 Selection as the cause of poor outcomes was high because of the availability of vitro-retinal  
354 services. Cases with retinal diseases had cataract surgery mainly for better view during retinal  
355 surgeries. This might have been the reason for the higher selection of the cases. The poor  
356 outcome was related to surgical complications which occurred either intraoperatively or  
357 postoperatively even through the hands of experienced surgeons.

358 Postoperative sequelae mainly posterior capsular opacification was the cause in 2 of the patients  
359 resulting in poor vision. However, this would be treated subsequently with Nd: YAG  
360 (neodymium:yttrium-aluminum-garnet) capsulotomy. The poor visual outcome was noted due to  
361 surgical complications including the postoperative sequelae amounting to around 62.7% in the  
362 second RAAB survey (6). The vision of these patients did not improve with refraction because  
363 these patients already had pre-existing ocular pathology which hampered the final visual  
364 outcome. Therefore, the BCVA remained poor for these patients. The prospective assessment of  
365 surgical outcomes probably contributed to better surgical outcomes. Monitoring has enhanced  
366 the results of postoperative cataract surgery. The technique of tracking results and providing  
367 operating surgeons with feedback guarantees that the standard of postoperative eyesight is at the  
368 forefront and is constantly highlighted. The institution's goal of recovering vision is always  
369 maintained, even if the operating doctors change, as is typical in any significant institution.

370 Identifying the cases with any ocular pathology before the surgery would help plan and  
371 anticipate before surgery and also guide through patient's counseling both preoperatively and  
372 postoperatively.

373

374 The strength of the study was that it was a hospital-based study (only a tertiary eye care center)  
375 and data collection was swift and suitable. The study included a large sample size which could

376 likely be representative of the volume of SICS performed at the hospital and the study used a  
377 standard pro forma recommended by WHO.

378

379 A few limitations of the study were that it involved all the ophthalmologists at the Department of  
380 Ophthalmology who performed SICS and the conclusions from the study were drawn as a whole  
381 and not for individual surgeons. The study assessed outcomes only at 6 weeks post-SICS,  
382 providing insights into short-term outcomes. Longer-term follow-up data would have been  
383 valuable to assess the durability of visual improvements, refractive outcomes, and potential long-  
384 term complications. Although a considerable sample size was chosen, it was not representative  
385 when compared with other population-based studies. There was a loss in patient follow-up  
386 during the study period. The study was conducted at a single tertiary referral hospital, which  
387 might have limited the generalizability of the findings to other healthcare settings or populations.

388

### 389 **Conclusions**

390 As a result of cataract surgery, patients with poor vision had improved visual acuity, according to  
391 this study. The results also showed how crucial a thorough pre-surgical assessment is to avoiding  
392 complications and guaranteeing a successful procedure. A good visual outcome was achieved,  
393 better than the WHO recommendation for tracking visual outcomes and in line with studies  
394 conducted in the area and other industrialized nations.

395 The success of cataract surgery should, however, be routinely monitored at hospitals in  
396 underdeveloped nations like Bhutan so that any challenges can be found and the proper steps can  
397 be made to close the gaps. To fully assess the total effect of cataract surgery on patients' welfare  
398 and everyday functioning, this study advises long-term follow-up following cataract surgery.

399 **Acknowledgment**

400 I would like to express my gratitude to Dr. Nor Tshering Lepcha, Dr. Mendu Dukpa, and Dr.  
401 Karma Tenzin for their continued guidance throughout the planning, conduct, analysis, and  
402 manuscript writing of this thesis project. I would also like to thank Mr. Tshering Choeda and Mr.  
403 Indra Prasad Sharma.

404

405 I am thankful to the Faculty of Postgraduate Medicine, Khesar Gyalpo University of Medical  
406 Sciences of Bhutan (KGUMSB) and Jigme Dorji Wangchuck National Referral Hospital  
407 (JDWNRH) administration as well as to my fellow ophthalmology residents, optometrists, and  
408 ophthalmic assistants at Department of Ophthalmology.

409 I will remain forever indebted to all the consultants, patients, and their families who consented to  
410 participate in this study. I am grateful to the Ministry of Health for providing financial  
411 assistance to enable the smooth conduct of this study.

412

413

414

415

416

417

418

419

## 420 **References**

- 421 1. Bourne RRA, Flaxman SR, Braithwaite T, Cicinelli M V., Das A, Jonas JB, et al.  
422 Magnitude, temporal trends, and projections of the global prevalence of blindness and  
423 distance and near vision impairment: a systematic review and meta-analysis. *Lancet Glob*  
424 *Heal.* 2017;5(9):e888–97.
- 425 2. Flaxman SR, Bourne RRA, Resnikoff S, Ackland P, Braithwaite T, Cicinelli M V., et al.  
426 Global causes of blindness and distance vision impairment 1990–2020: a systematic  
427 review and meta-analysis. *Lancet Glob Heal.* 2017;5(12):e1221–34.
- 428 3. National Statistical Bureau of Bhutan. Population Projections of Bhutan 2005–2030.  
429 <http://www.nsb.gov.bt/publication/publications.php.id=2> Assessed on 07.06.2021.
- 430 4. Course S. Lens and Cataract. *All about Your Eyes, Second Ed Revis Updat.* 2021;74–81.  
431 . Lepcha NT, Chettri CK, Getshen K, Rai BB, Bindiganavale Ramaswamy S, Saibaba S, et  
432 al. Rapid assessment of avoidable blindness in Bhutan. *Ophthalmic Epidemiol.* 2013  
433 Aug;20(4):212–9.
- 434 5. WHO Informal Consultation on Analysis of Blindness Prevention Outcomes (1998:  
435 Geneva, Switzerland) & WHO Programme for the Prevention of Blindness and Deafness.  
436 (1998). *Informal Consultation on Analysis of Blindness Prevention Outcomes, Geneva,*  
437 *16-18. 1998.*
- 438 6. Lepcha NT, Sharma IP, Sapkota YD, Das T, Phuntsho T, Tenzin N, et al. Changing trends  
439 of blindness, visual impairment and cataract surgery in Bhutan: 2009–2018. *PLoS One.*  
440 2019 May 1;14(5).

- 441 7. Ferdosh JU, Uddin M, Husain R. Visual outcome after cataract surgery in a tertiary eye  
442 hospital of Chittagong district, Bangladesh. *Asian J Med Biol Res.* 2019;5(3):212–8.
- 443 8. Khanna RC, Rathi VM, Guizie E, Singh G, Nishant K, Sandhu S, et al. Factors associated  
444 with visual outcomes after cataract surgery: A cross-sectional or retrospective study in  
445 Liberia. *PLoS One.* 2020;15(5).
- 446 9. Cox JT, Subburaman GBB, Munoz B, Friedman DS, Ravindran RD. Visual Acuity  
447 Outcomes after Cataract Surgery: High-Volume versus Low-Volume  
448 Surgeons. *Ophthalmology.* 2019;126(11):1480–1489.
- 449 10. Matta S, Park J, Shantha GPS, Khanna RC, Rao GN. Cataract surgery visual outcomes  
450 and associated risk factors in secondary level eye care centers of L V Prasad Eye Institute,  
451 India. *PLoS One.* 2016;11(1):1–11.
- 452 11. Norregaard JC, Hindsberger C, Alonso J, Bellan L, Bernth-Petersen P, Black C et al.  
453 Visual outcomes of cataract surgery in the United States, Canada, Denmark, and Spain.  
454 *Arch Ophthalmol.* 1998;116(8):1095-100
- 455 12. Gogate P, Optom JJ, Deshpande S, Naidoo K. Meta-analysis to Compare the Safety and  
456 Efficacy of Manual Small Incision Cataract Surgery and Phacoemulsification. *Middle East  
457 Afr J Ophthalmol.* 2015;22(3):362-369.
- 458 13. Venkatesh R, Muralikrishnan R, Balent LC, Prakash SK, Prajna NV. Outcomes of high  
459 volume cataract surgeries in a developing country. *Br J Ophthalmol.* 2005;89(9):1079–83.
- 460 14. Manhas A, Manhas RS, Manhas GS, Gupta D. Visual Outcome among Patients  
461 Undergone Manual Small Incision Cataract Surgery Following their Identification in  
462 Screening Eye Camp in Jammu Province. *Int J Contemp Med Res [IJCMR].* 2019;6(1).

- 463 15. Keel S, Xie J, Foreman J, Taylor HR, Dirani M. Population-based assessment of visual  
464 acuity outcomes following cataract surgery in Australia: The National Eye Health Survey.  
465 *Br J Ophthalmol*. 2018;102(10):1419–24.
- 466 16. Olawoye OO, Ashaye AO, Bekibele CO, Ajayi BG. Visual outcome after cataract surgery  
467 at the university college hospital, Ibadan. *Ann Ib Postgrad Med*. 2011;9(1):8-13
- 468 17. Bekibele CO, Fasina O. Visual outcome of traumatic cataract surgery in Ibadan, Nigeria.  
469 *Niger J Clin Pract*. 2008;11(4):372-5.
- 470 18. Hennig A, Kumar J, Yorston D, Foster A. Sutureless cataract surgery with nucleus  
471 extraction: outcome of a prospective study in Nepal. *Br J Ophthalmol*. 2003;87(3):266-70.
- 472 19. Kandel RP, Sapkota YD, Sherchan A, Sharma MK, Aghajanian J, Bassett KL. Cataract  
473 surgical outcome and predictors of outcome in Lumbini Zone and Chitwan District of  
474 Nepal. *Ophthalmic epidemiology*. 2010 Oct;17(5):276-81.
- 475 20. Bhatta S, Patel PJ, Awasthi S, Pant N, Pant SR. Visual outcomes of high-volume  
476 compared with low-volume manual small-incision cataract surgery in Nepal. *Journal of*  
477 *Cataract & Refractive Surgery*. 2020 Aug;46(8):1119-25.
- 478 21. Ruit S, Tabin GC, Nissman SA, Paudyal G, Gurung R. Low-cost high-volume  
479 extracapsular cataract extraction with posterior chamber intraocular lens implantation in  
480 Nepal. *Ophthalmology*. 1999 Oct;106(10):1887-92.
- 481 22. Yorston D, Gichuhi S, Wood M, Foster A. Does prospective monitoring improve cataract  
482 surgery outcomes in Africa? *Br J Ophthalmol*. 2002;86(5):543-7.
- 483 23. Hussen MS, Gebreselassie KL, Seid MA, Belete GT. Visual outcome of cataract surgery



- 484 at Gondar university hospital tertiary eye care and training center, North West Ethiopia.  
485 Clin Optom. 2017;9:19–23.
- 486 24. Livingston PM, Lee SE, McCarty CA, Taylor HR. A comparison of participants with non-  
487 participants in a population-based epidemiologic study: the Melbourne Visual Impairment  
488 Project. *Ophthalmic epidemiology*. 1997 Jan;4(2):73-81.
- 489 25. Zafar S, Chen X, Sikder S, Srikumaran D, Woreta FA. Outcomes of resident-performed  
490 small incision cataract surgery in a university-based practice in the USA. *Clinical*  
491 *Ophthalmology (Auckland, NZ)*. 2019;13:529.
- 492 26. Hashemi H, Mohammadi SF, Z-Mehrjardi H, Majdi M, Ashrafi E, Mehravaran S, Mazouri  
493 A, Roohipoor R, KhabazKhoob M. The role of demographic characteristics in the  
494 outcomes of cataract surgery and gender roles in the uptake of postoperative eye care: a  
495 hospital-based study. *Ophthalmic epidemiology*. 2012 Aug;19(4):242-8.
- 496 27. Murthy GV, Vashist P, John N, Pokharel G, Ellwein LB. Prevalence and vision-related  
497 outcomes of cataract surgery in Gujarat, India. *Ophthalmic epidemiology*. 2009  
498 Dec;16(6):400-9.
- 499 28. Lam DS, Congdon NG, Rao SK, Fan H, Liu Y, Zhang L, Lin X, Choi K, Zheng Z, Huang  
500 W, Zhou Z. Visual outcomes and astigmatism after sutureless, manual cataract extraction  
501 in rural China: study of cataract outcomes and up-take of services (SCOUTS) in the caring  
502 is hip project, report 1. *Archives of Ophthalmology*. 2007 Nov;125(11):1539-44.
- 503 29. Gogate P, Vakil V, Khandekar R, Deshpande M, Limburg H. Monitoring and  
504 modernization to improve visual outcomes of cataract surgery in a community eyecare  
505 center in western India. *Journal of Cataract & Refractive Surgery*. 2011 Feb;37(2):328-34.

- 506 30. Khandekar RB, Jain BK, Sudhan AK, Pandey KP. Visual acuity at 6 weeks after small  
507 incision cataract surgery and role of audit in predicting visual acuity. *European journal of*  
508 *ophthalmology*. 2010 Mar;20(2):345-52.
- 509 31. Zhou B, Lu Y, Hajifathalian K, Bentham J, Di Cesare M, Danaei G, et al. Worldwide  
510 trends in diabetes since 1980: A pooled analysis of 751 population-based studies with 4.4  
511 million participants. *Lancet*. 2016;387(10027):1513–30.
- 512 32. Yuan J, Wang X, Yang LQ, Xing YQ, Yang YN. Assessment of visual outcomes of  
513 cataract surgery in Tujia nationality in Xianfeng County, China. *International Journal of*  
514 *Ophthalmology*. 2015;8(2):292.
- 515 33. Kawasaki R, Wang JJ, Ji GJ, Taylor B, Oizumi T, Daimon M, Kato T, Kawata S, Kayama  
516 T, Tano Y, Mitchell P. Prevalence and risk factors for age-related macular degeneration in  
517 an adult Japanese population: the Funagata study. *Ophthalmology*. 2008  
518 Aug;115(8):1376-81.
- 519 34. Varma R, Kim JS, Burkemper BS, Wen G, Torres M, Hsu C, Choudhury F, Azen SP,  
520 McKean-Cowdin R, Chinese American Eye Study Group. Prevalence and causes of visual  
521 impairment and blindness in Chinese American adults: the Chinese American eye study.  
522 *JAMA ophthalmology*. 2016 Jul;134(7):785-93.
- 523 35. Duan XR, Liang YB, Wang NL, Wong TY, Sun LP, Yang XH, Tao QS, Yuan RZ,  
524 Friedman DS. Prevalence and associations of cataract in a rural Chinese adult population:  
525 the Handan Eye Study. *Graefes Archive for Clinical and Experimental Ophthalmology*.  
526 2013 Jan;251:203-12.
- 527 36. Henderson BA, Kim JY, Ament CS, Ferrufino-Ponce ZK, Grabowska A, Cremers SL.

- 528 Clinical pseudophakic cystoid macular edema: risk factors for development and duration  
529 after treatment. *Journal of Cataract & Refractive Surgery*. 2007 Sep;33(9):1550-8.
- 530 37. Addagarla SR. Postoperative visual outcomes after cataract surgery in a teaching hospital.  
531 *Indian Journal of Clinical and Experimental Ophthalmology*. 2020;6(1):29-34.
- 532 38. Lundström M, Barry P, Henry Y, Rosen P, Stenevi U. Visual outcome of cataract surgery;  
533 study from the European Registry of Quality Outcomes for Cataract and Refractive  
534 Surgery. *Journal of Cataract & Refractive Surgery*. 2013 May;39(5):673-9.
- 535 39. Yorston D, Foster A. Audit of extracapsular cataract extraction and posterior chamber lens  
536 implantation as a routine treatment for age related cataract in east Africa. *British Journal  
537 of Ophthalmology*. 1999 Aug;83(8):897-901.
- 538 40. Egbert PR, Buchanan M. Results of extracapsular cataract surgery and intraocular lens  
539 implantation in Ghana. *Archives of ophthalmology*. 1991 Dec;109(12):1764-8.
- 540 41. Yorston D, Gichuhi S, Wood M, Foster A. Does prospective monitoring improve cataract  
541 surgery outcomes in Africa?. *British Journal of Ophthalmology*. 2002 May;86(5):543-7.
- 542 42. Signes-Soler I, Javaloy J, Montés-Micó R, Muñoz G, Albarrán-Diego C. Efficacy and  
543 safety of mass cataract surgery campaign in a developing country. *Optometry and Vision  
544 Science*. 2013 Feb;90(2):185-90.
- 545 43. Xiao B, Guan C, He Y, Le Mesurier R, Müller A, Limburg H, Iezze B. Cataract surgical  
546 outcomes from a large-scale micro-surgical campaign in China. *Ophthalmic  
547 epidemiology*. 2013 Oct;20(5):288-93.
- 548 44. Ezegwui IR, Ajewole J. Monitoring cataract surgical outcome in a Nigerian mission

- 549 hospital. International ophthalmology. 2009 Feb;29:7-9.
- 550 45. Lai FH, Lok JY, Chow PP, Young AL. Clinical outcomes of cataract surgery in very  
551 elderly adults. Journal of the American Geriatrics Society. 2014 Jan;62(1):165-70.
- 552 46. Lepcha NT, Chettri CK, Getshen K, Rai BB, Bindiganavale Ramaswamy S, Saibaba S,  
553 Nirmalan PK, Demarchis EH, Tabin G, Morley M, Morley K. Rapid assessment of  
554 avoidable blindness in Bhutan. Ophthalmic epidemiology. 2013 Aug;20(4):212-9.

# Figure 1: Age distribution of patients who underwent SICS at Jigme Dorji Wangchuck National Referral Hospital, Thimphu, Bhutan from 1<sup>st</sup> September 2021 to 30<sup>th</sup> April 2022 (n=310)

2022 (n=310)

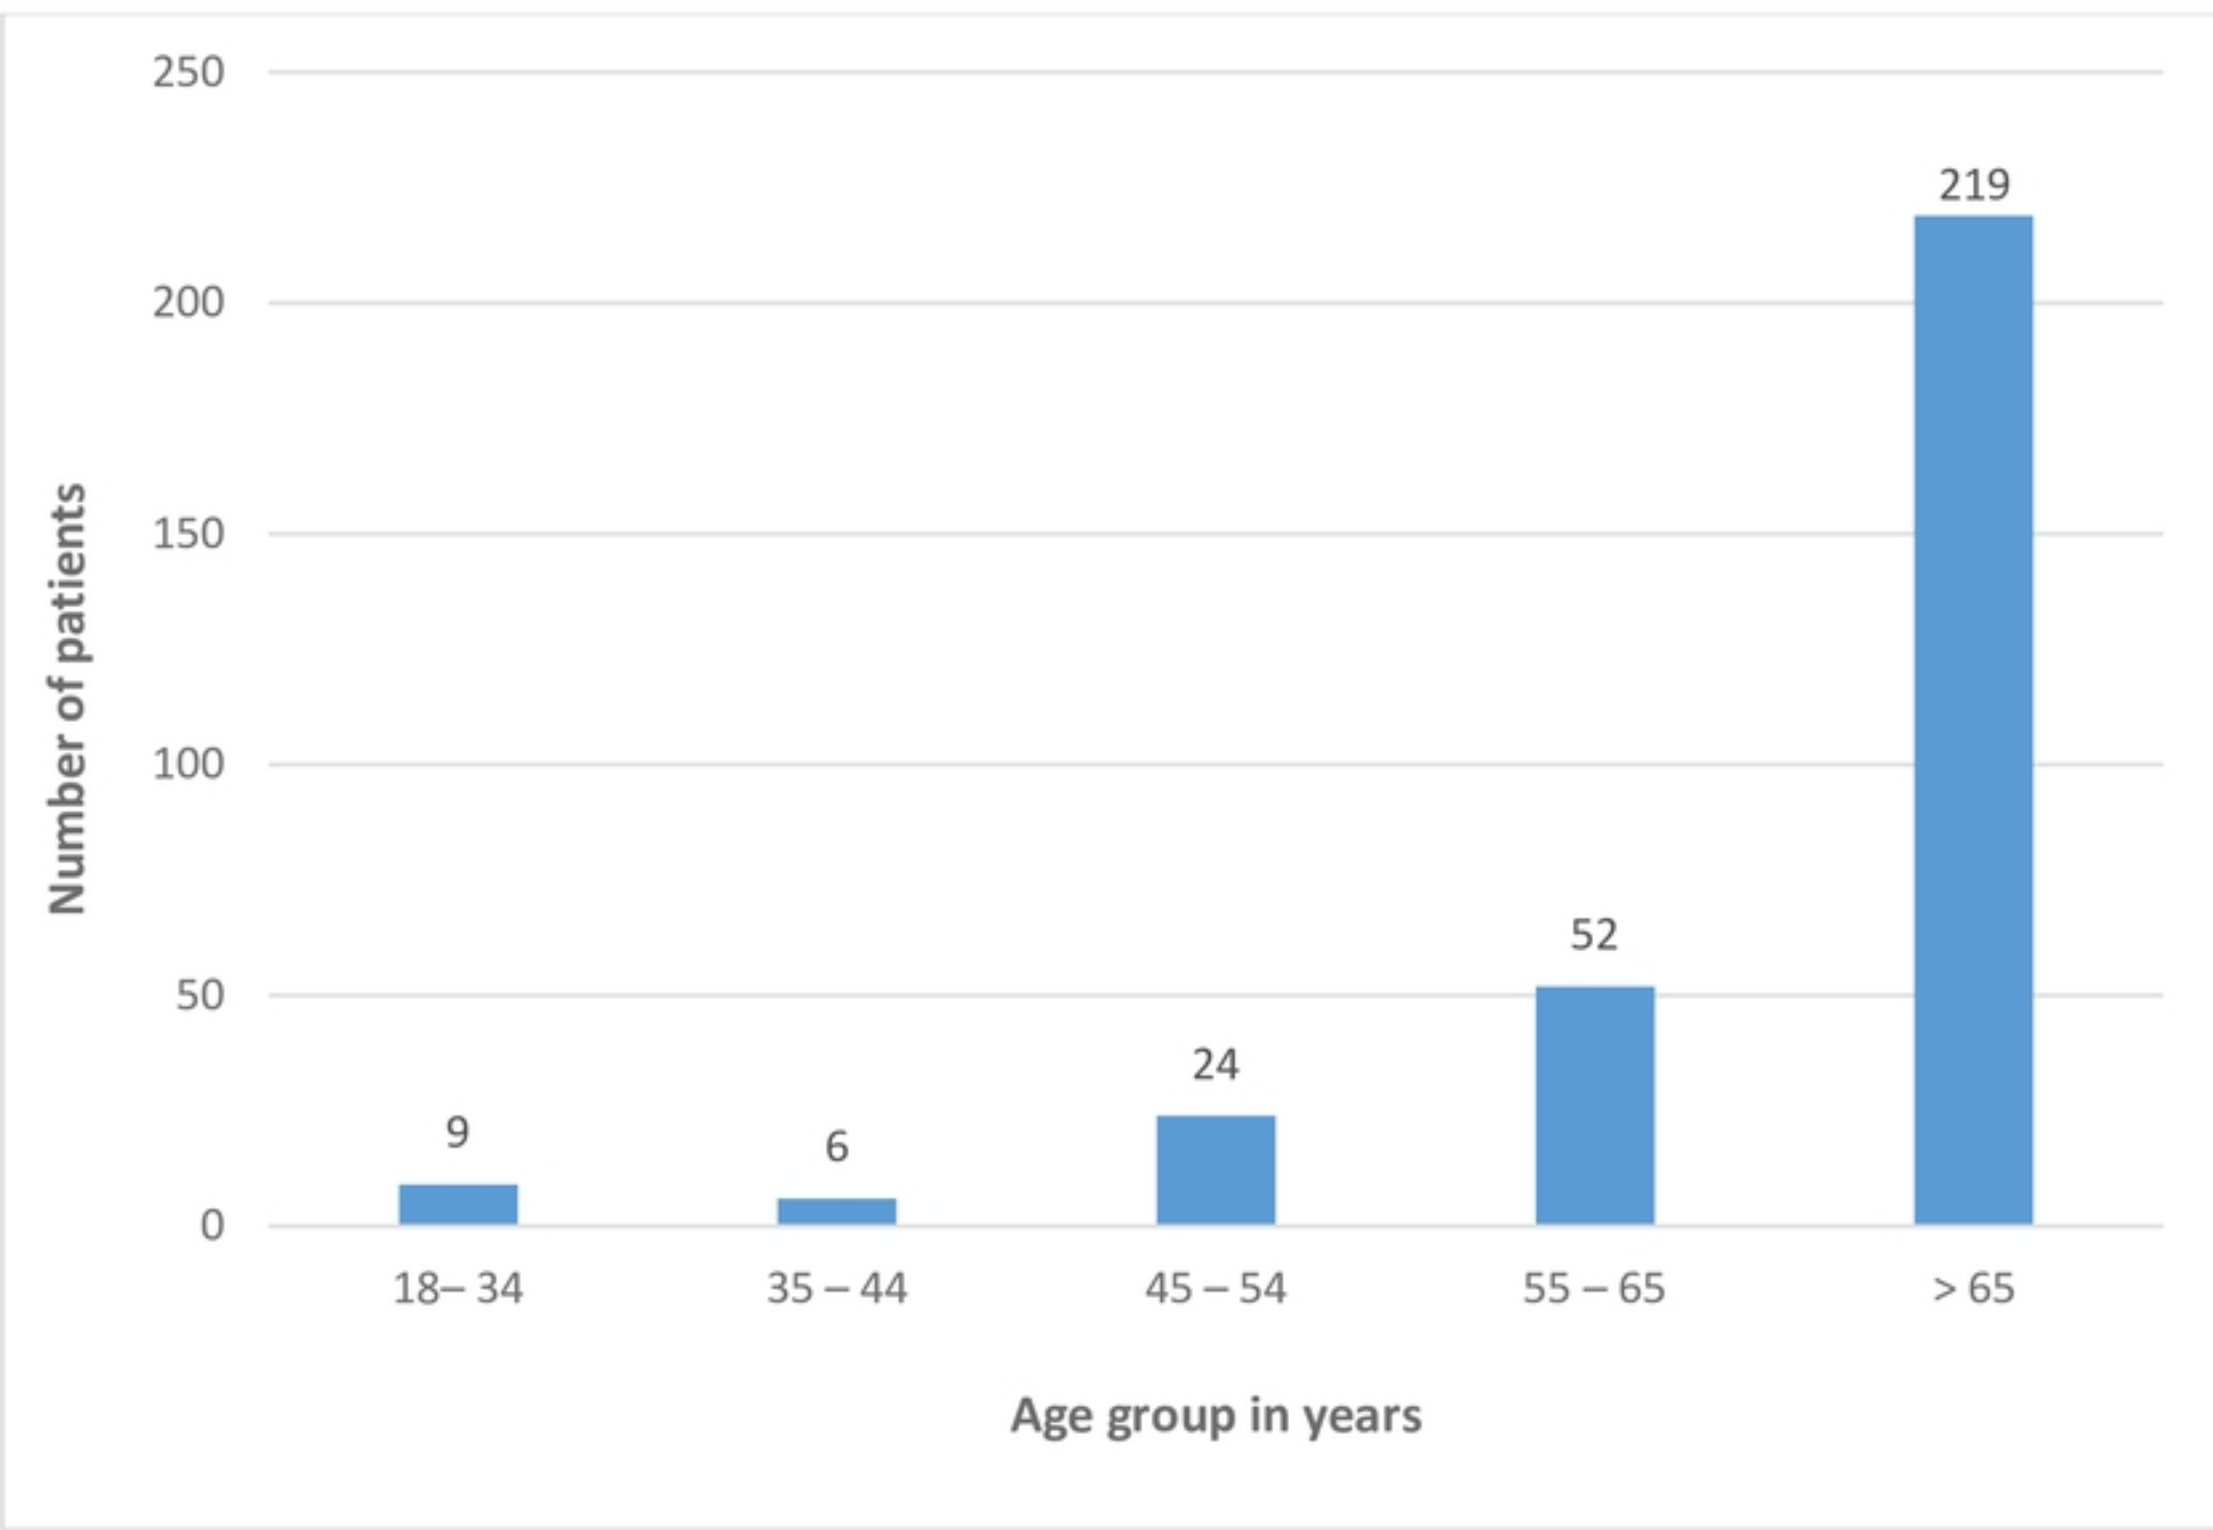

Figure 1

Figure 2: Occupation of patients who underwent SICS at Jigme Dorji Wangchuck

National Referral Hospital, Thimphu, Bhutan from 1<sup>st</sup> September 2021 to 30<sup>th</sup> April

2022 (n=310)

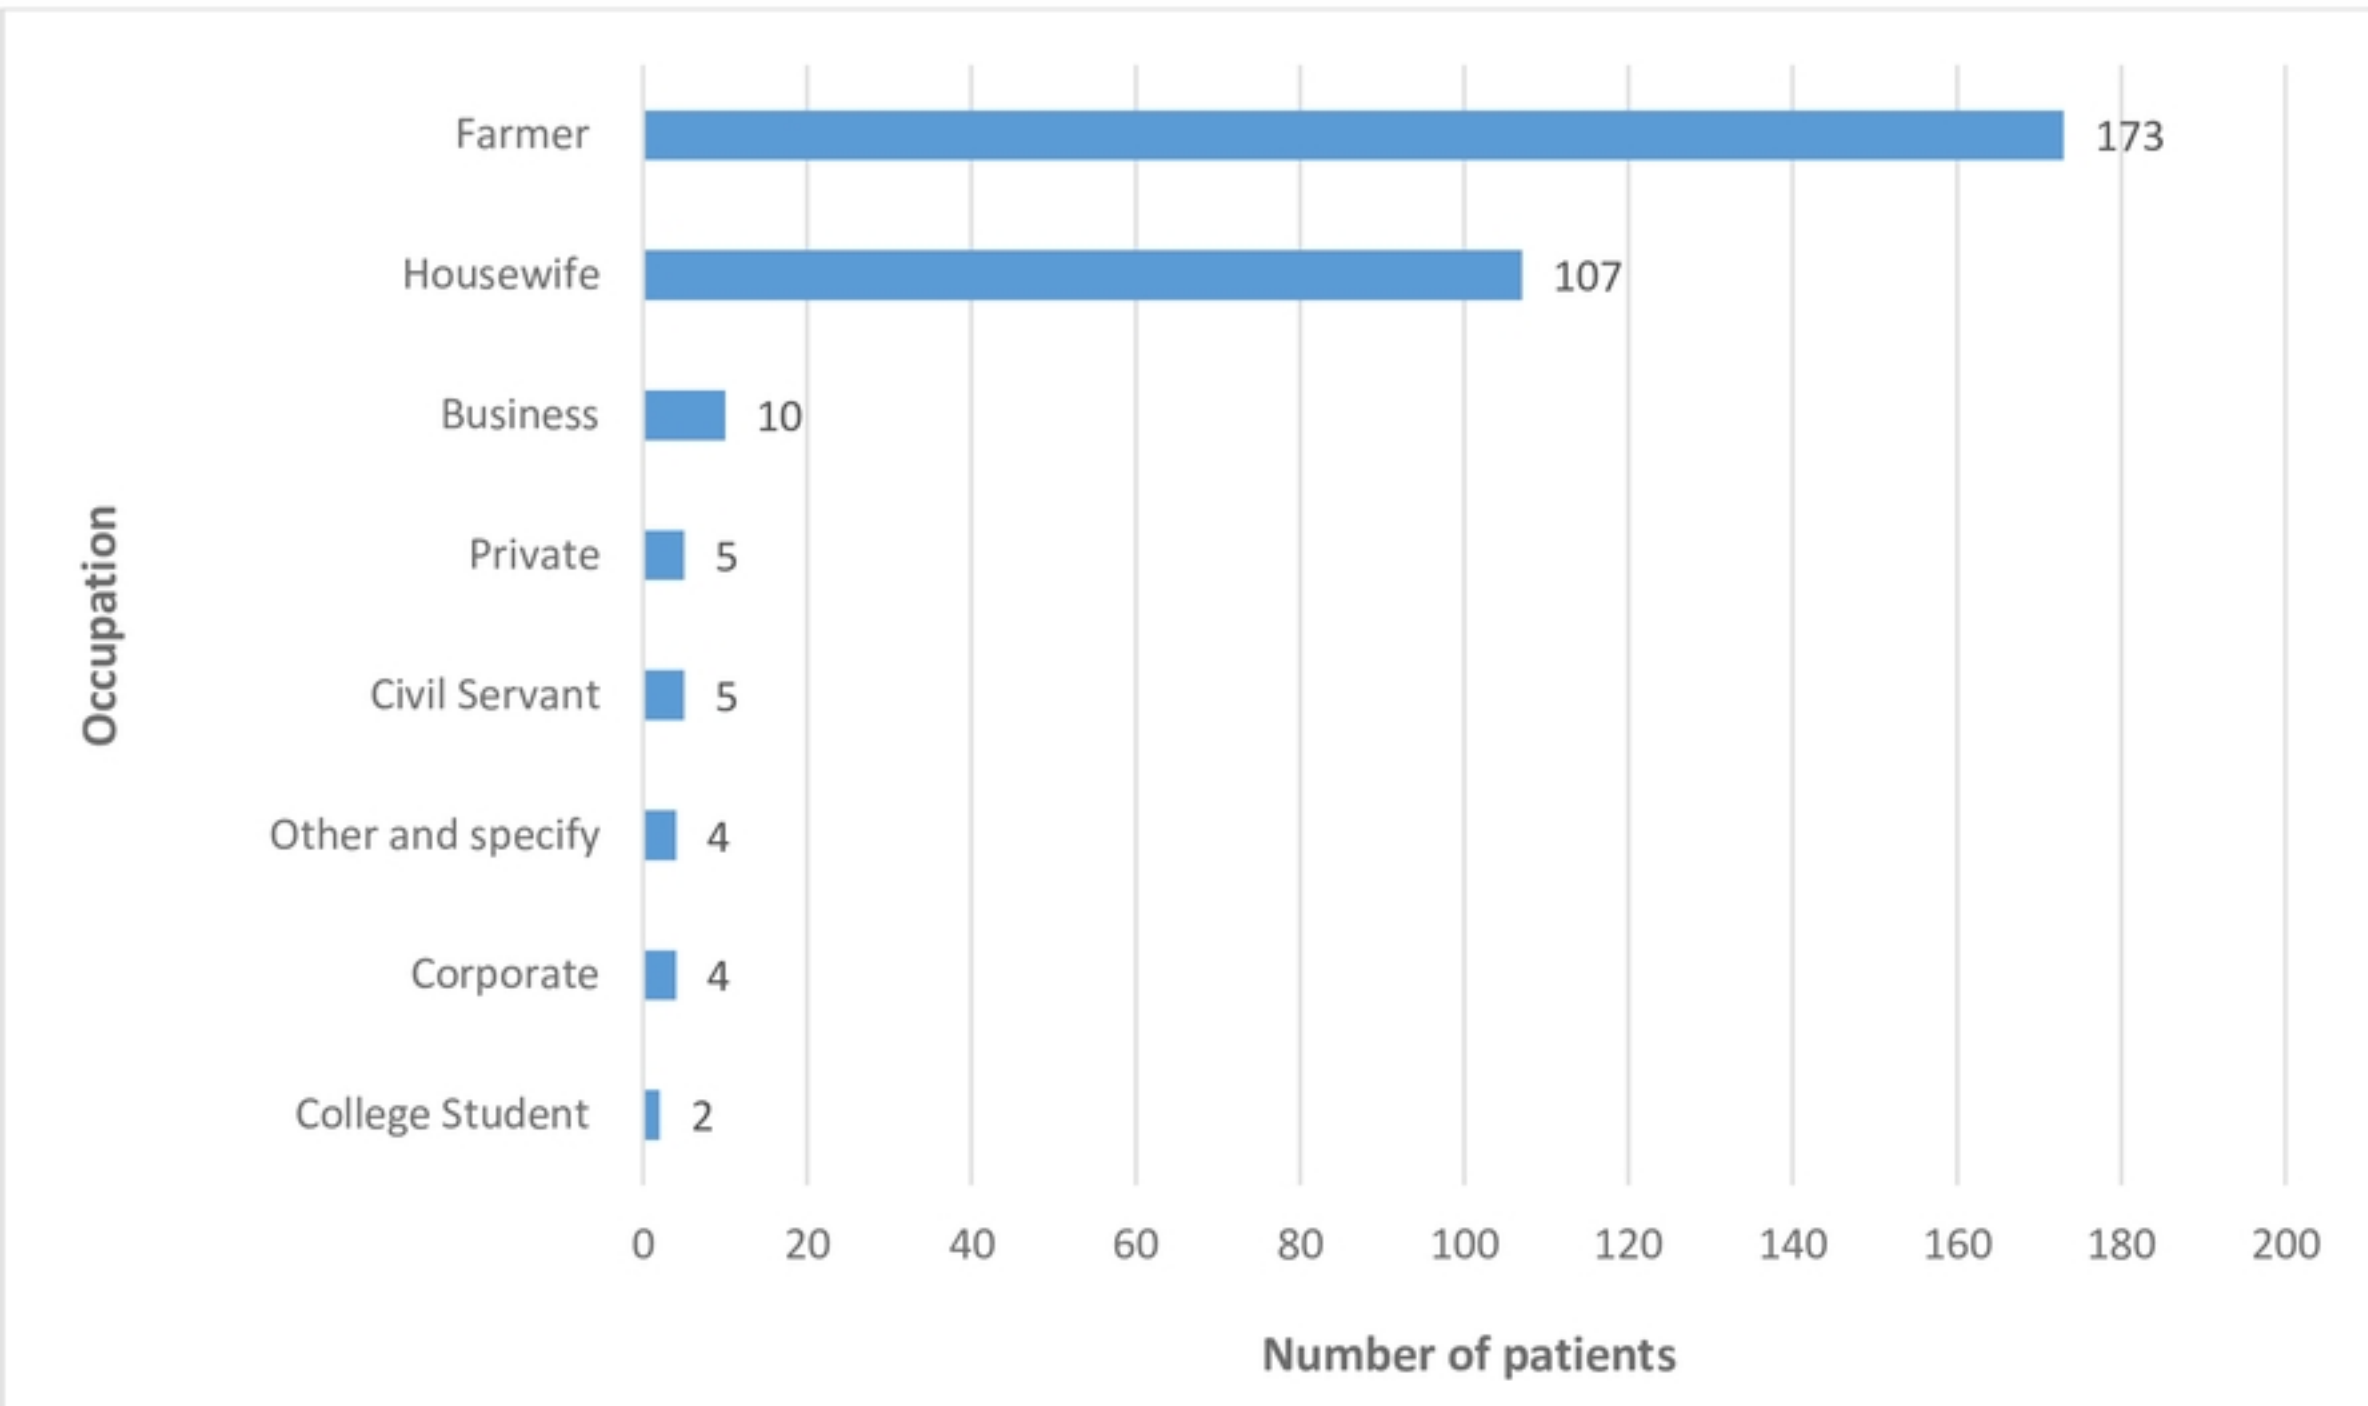

Figure 2

**Figure 3: Systemic comorbidities among patients who underwent SICS at Jigme Dorji Wangchuck National Referral Hospital, Thimphu, Bhutan from 1<sup>st</sup> September 2021 to 30<sup>th</sup> April 2022 (n=310)**

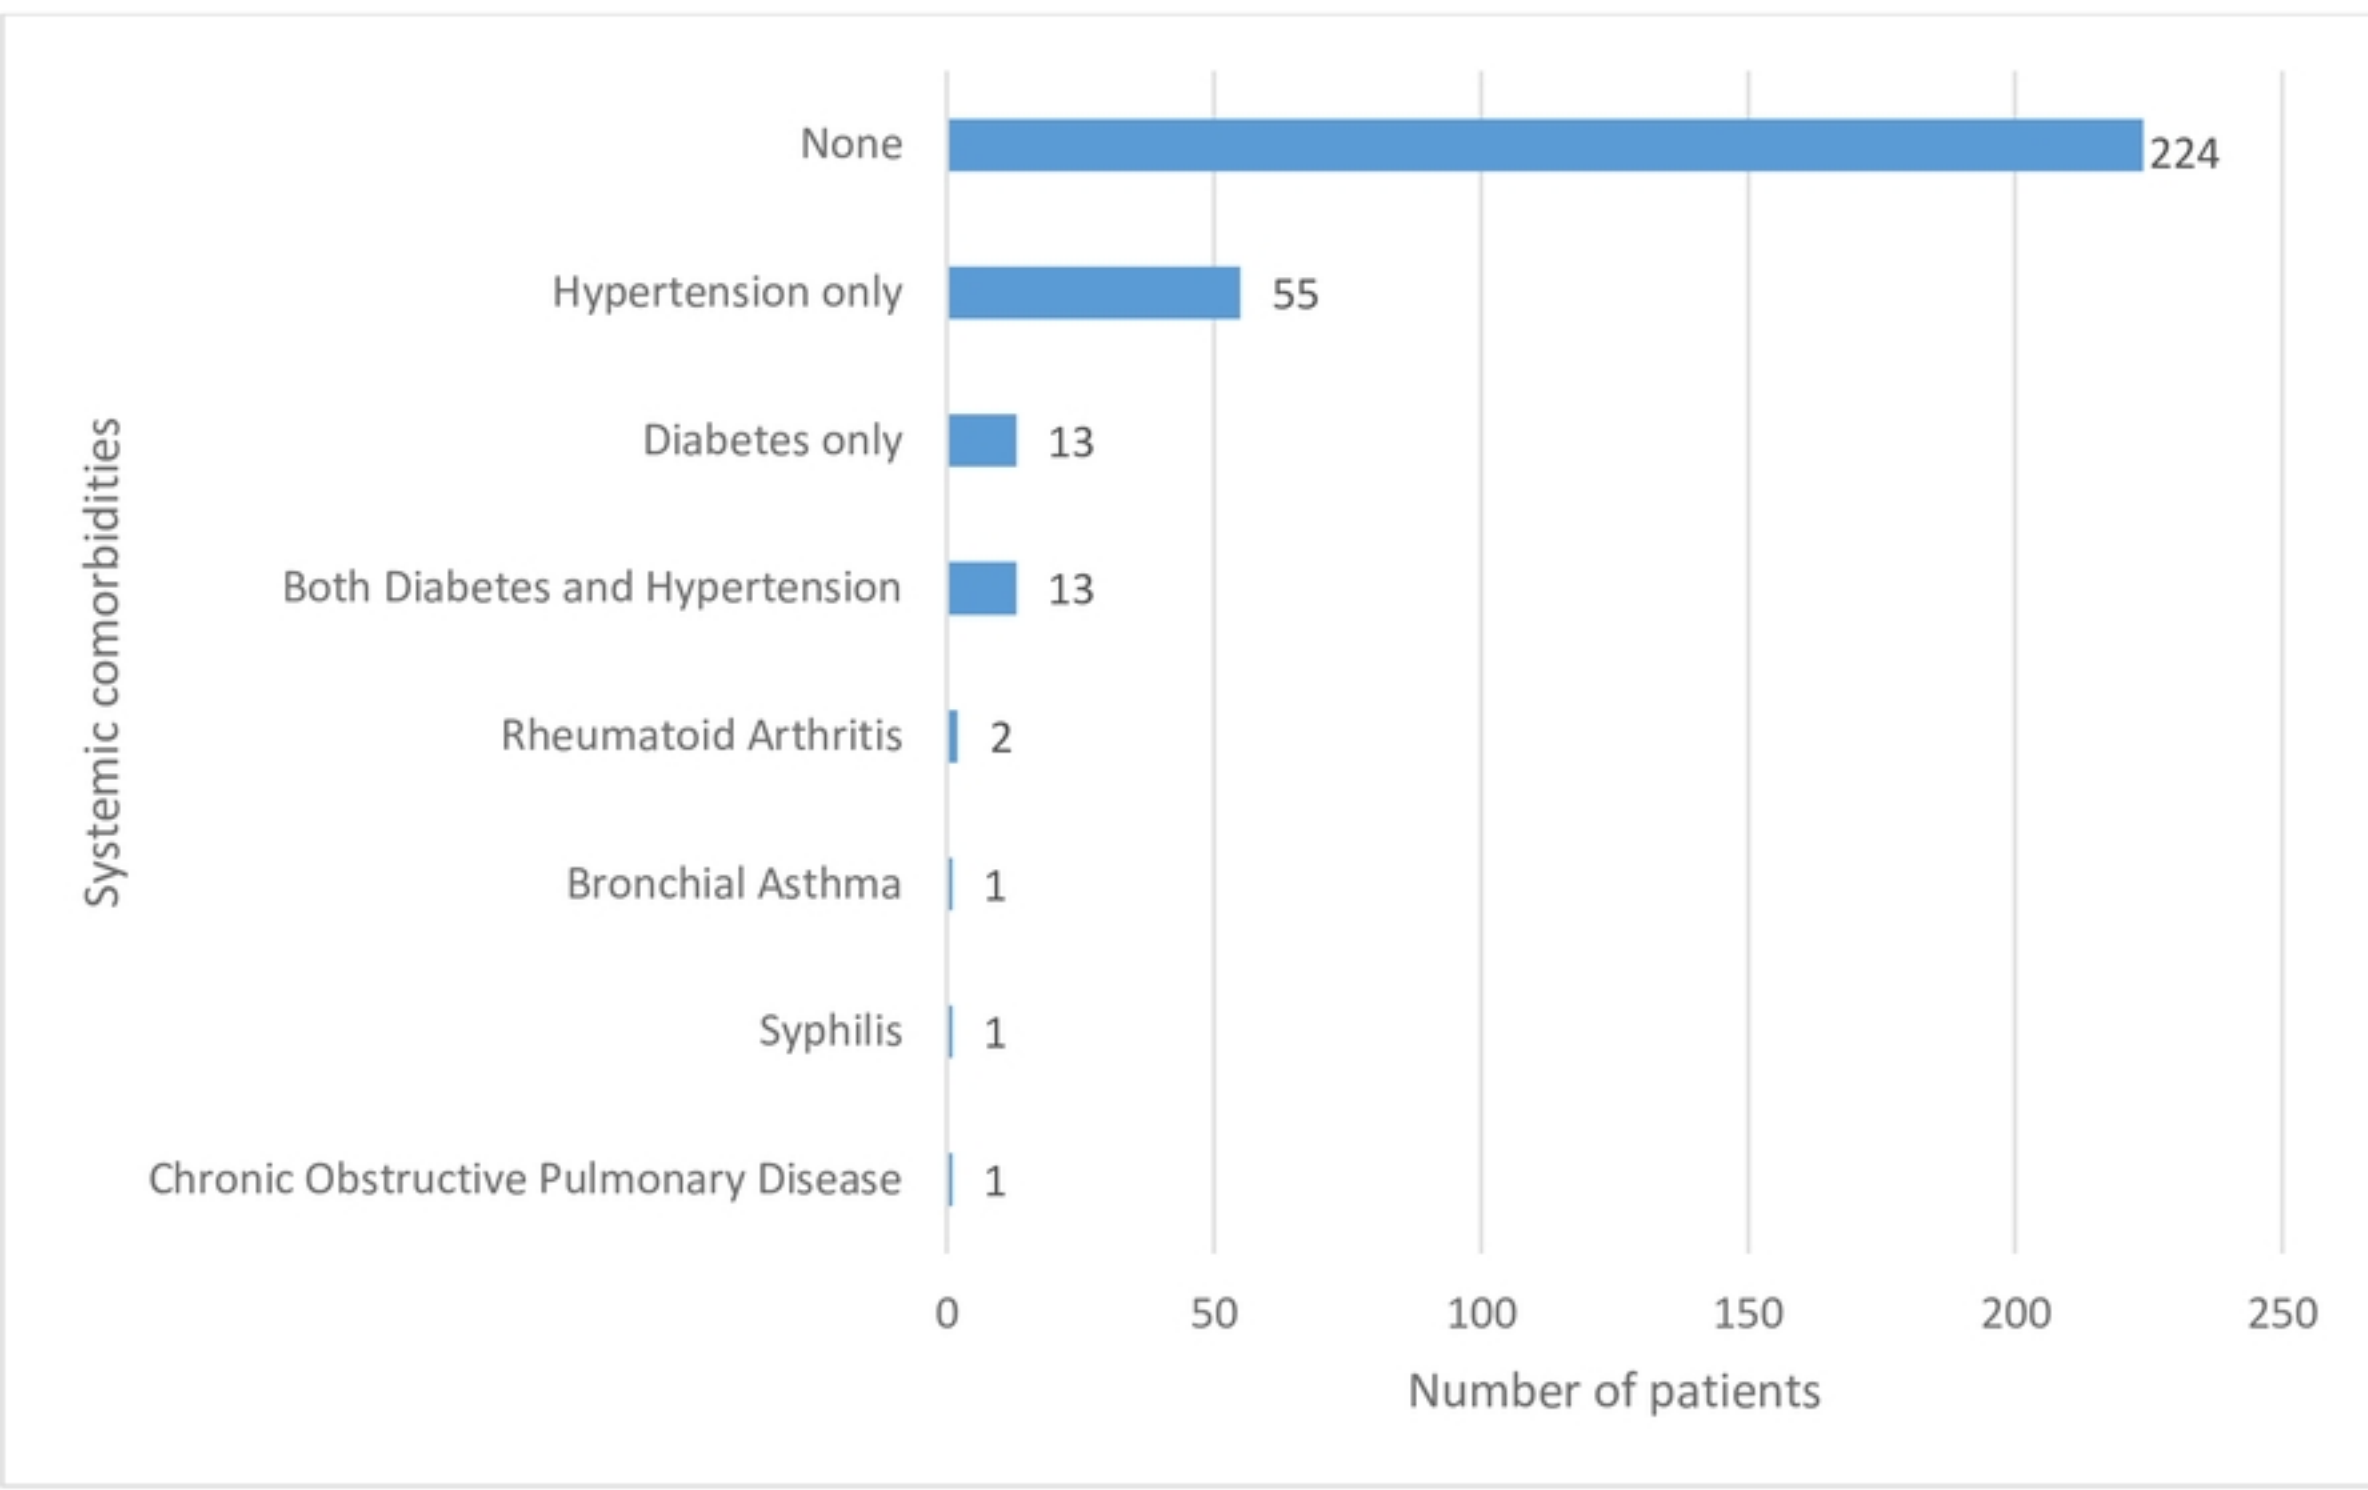

**Figure 3**

**Figure 4: Total number of patients with BCVA at different post-operative visits at Jigme Dorji Wangchuck National Referral Hospital, Thimphu, Bhutan from 1<sup>st</sup> September 2021 to 30<sup>th</sup> April 2022 (n=310)**

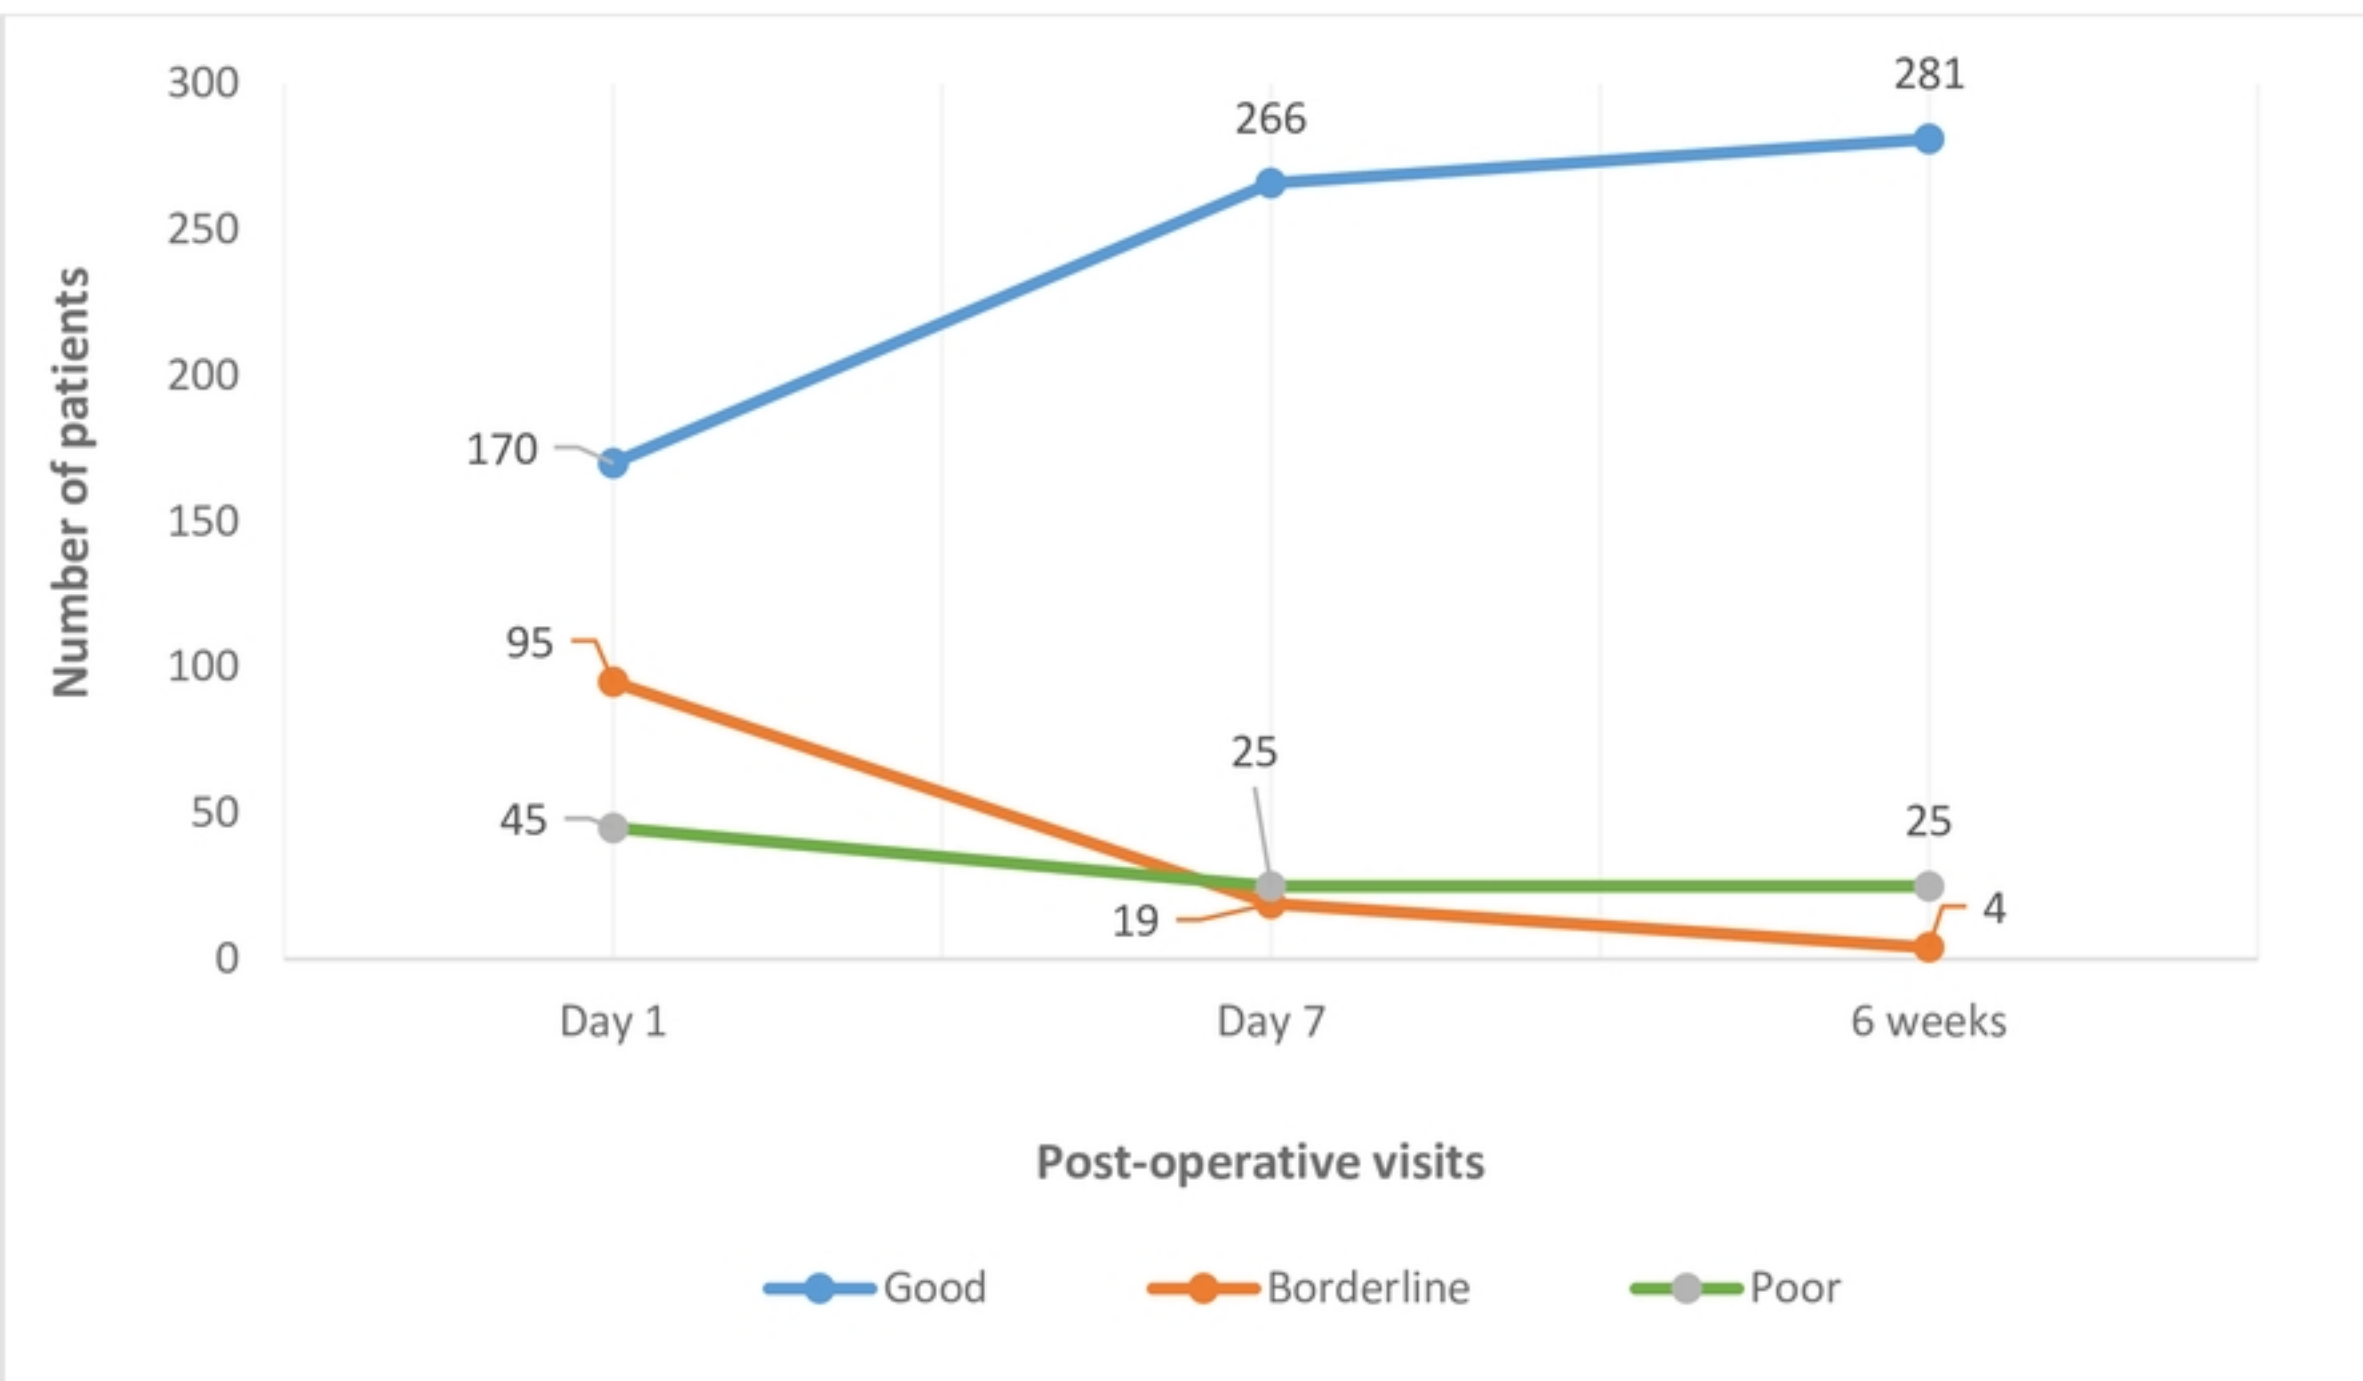

Figure 4
